# Supplementary material
Source: publisher site journal article supplement (https://www.dovepress.com/article/581374)
Supplement: Supplementary file 1 [file 581374%20Supplementary%20Material.docx]

**Supplementary Table S1. Comparison of multivariable logistic regression models (Models A–D) for predicting LTBI in patients with diabetes mellitus**

|  | **Model A (Core)** | **Model B (A + Smoking)** | **Model C (B + HbA1c)** | **Model D (C + Retinopathy)** |
| --- | --- | --- | --- | --- |
|  |  |  |  |  |
| Age >60 years, OR (95%CI) | 4.994 (1.583-17.610) | 4.687 (1.421-16.234) | 4.523 (1.356-15.876) | 4.412 (1.298-15.534) |
| Male sex, OR (95%CI) | 26.886 (5.224-231.700) | 24.332 (4.812-208.451) | 23.876 (4.654-201.345) | 23.456 (4.523-198.765) |
| DM duration >10 years, OR (95%CI) | 3.450 (1.000-13.240) | 3.234 (0.923-12.876) | 3.156 (0.898-12.543) | 3.089 (0.876-12.234) |
| Hyperlipidemia, OR (95%CI) | 10.637 (2.299-82.340) | 9.854 (2.087-76.432) | 9.567 (2.012-73.876) | 9.345 (1.967-72.123) |
| Smoking, OR (95%CI) | — | 2.156 (0.987-5.234) | 2.089 (0.954-5.087) | 2.034 (0.923-4.987) |
| HbA1c (continuous), OR (95%CI) | — | — | 1.087 (0.923-1.287) | 1.076 (0.912-1.267) |
| Retinopathy, OR (95%CI) | — | — | — | 1.87 (0.91-3.76) |
|  |  |  |  |  |
| AUC (95%CI) | 0.847 (0.765-0.928) | 0.856 (0.778-0.934) | 0.861 (0.783-0.939) | 0.864 (0.787-0.941) |
| Optimism-corrected AUC | 0.791 | 0.798 | 0.801 | 0.803 |
| Calibration slope | 0.856 | 0.843 | 0.837 | 0.832 |
| Brier score | 0.164 | 0.161 | 0.159 | 0.158 |

*OR: odds ratio; CI: confidence interval; AUC: area under the curve; DM: diabetes mellitus; HbA1c: glycated hemoglobin A1c. Model A = age, sex, diabetes duration, hyperlipidemia; Model B = Model A + smoking; Model C = Model B + HbA1c (continuous); Model D = Model C + retinopathy. — indicates variable not included in that model.*
